# Supplementary material for: Hazard Assessment of the Effects of Acute and Chronic Exposure to Permethrin, Copper Hydroxide, Acephate, and Validamycin Nanopesticides on the Physiology of Drosophila: Novel Insights into the Cellular Internalization and Biological Effects
Source: MDPI journal article supplement (doi:10.3390/ijms23169121), 2022-08-14
Supplement: s1 [file s1]

## Supplementary Figure captions

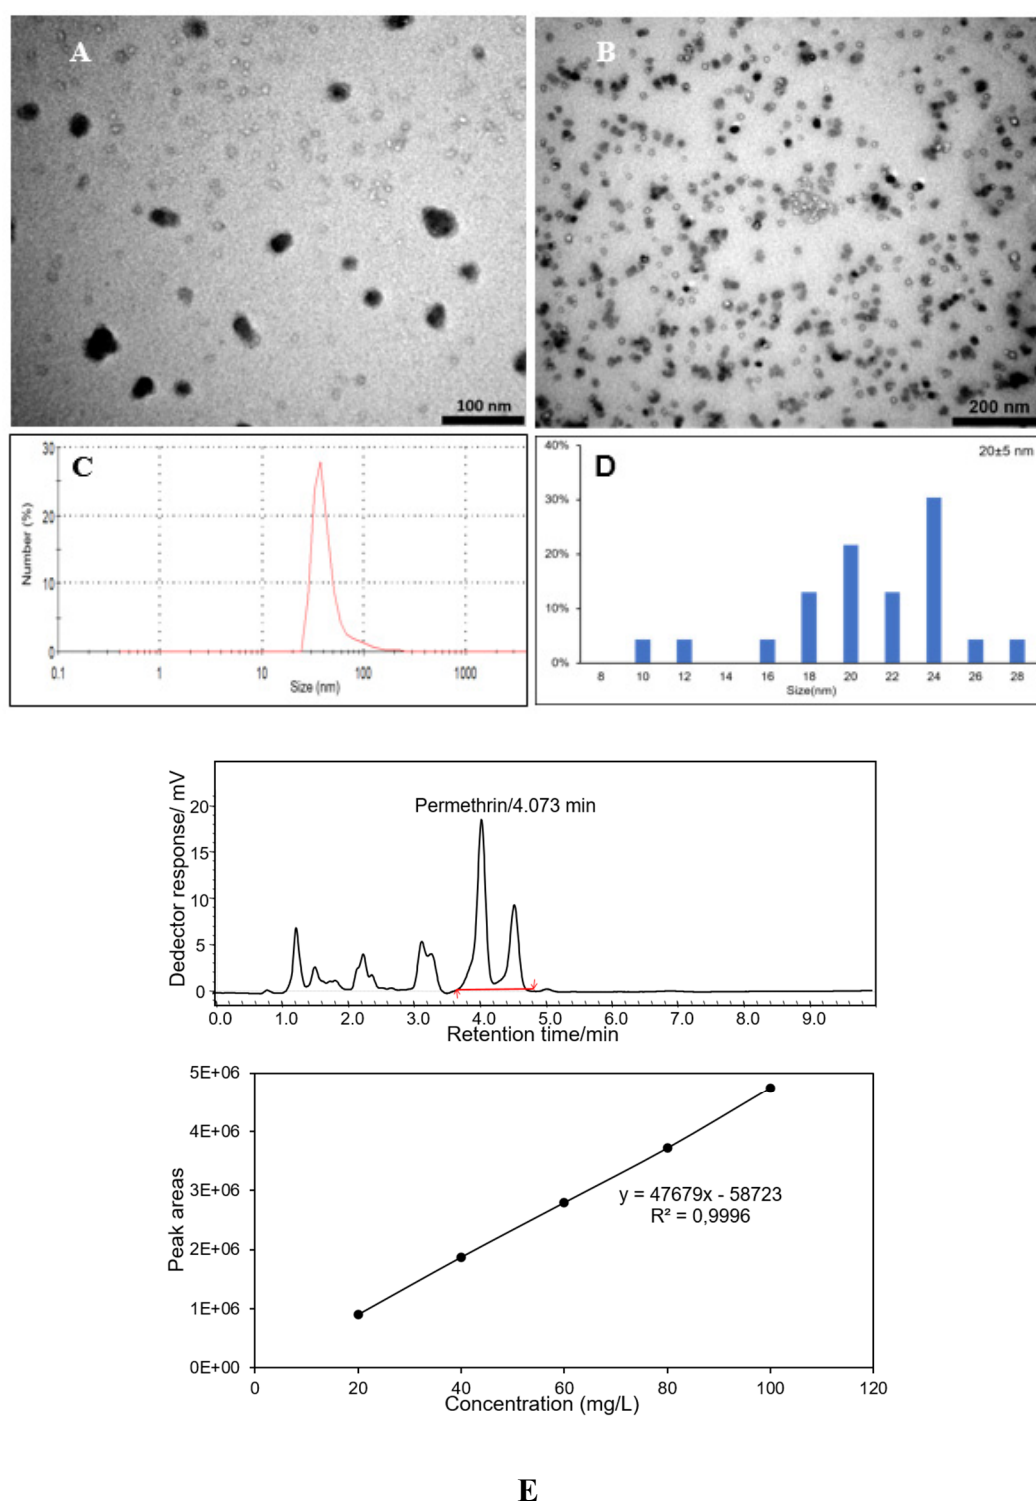

**Figure S1.** Characterization of permethrin nanopesticides ( $20 \pm 5$  nm). (A-B) Typical TEM images. (C) represents size distribution by DLS characterization. (D) size distribution histogram using such images. (E) HPLC spectrum and calibration curve of permethrin.

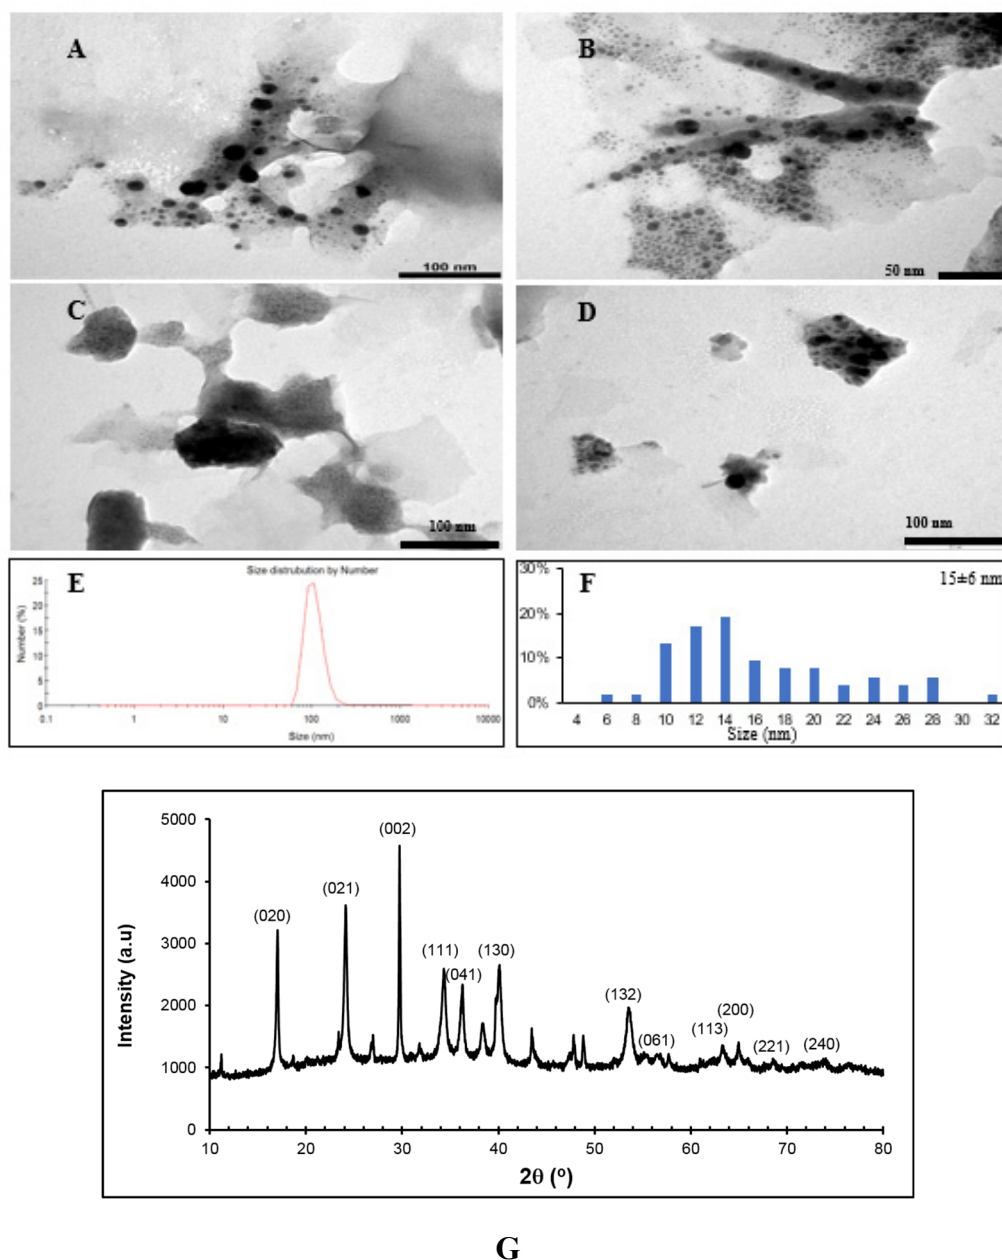

**Figure S2.** Characterization of  $\text{Cu}(\text{OH})_2$  nanopesticides ( $15 \pm 6$  nm). (A-D) Typical TEM images. (E) represents size distribution by DLS characterization. (F) size distribution histogram using such images. (G) XRD diffraction pattern.

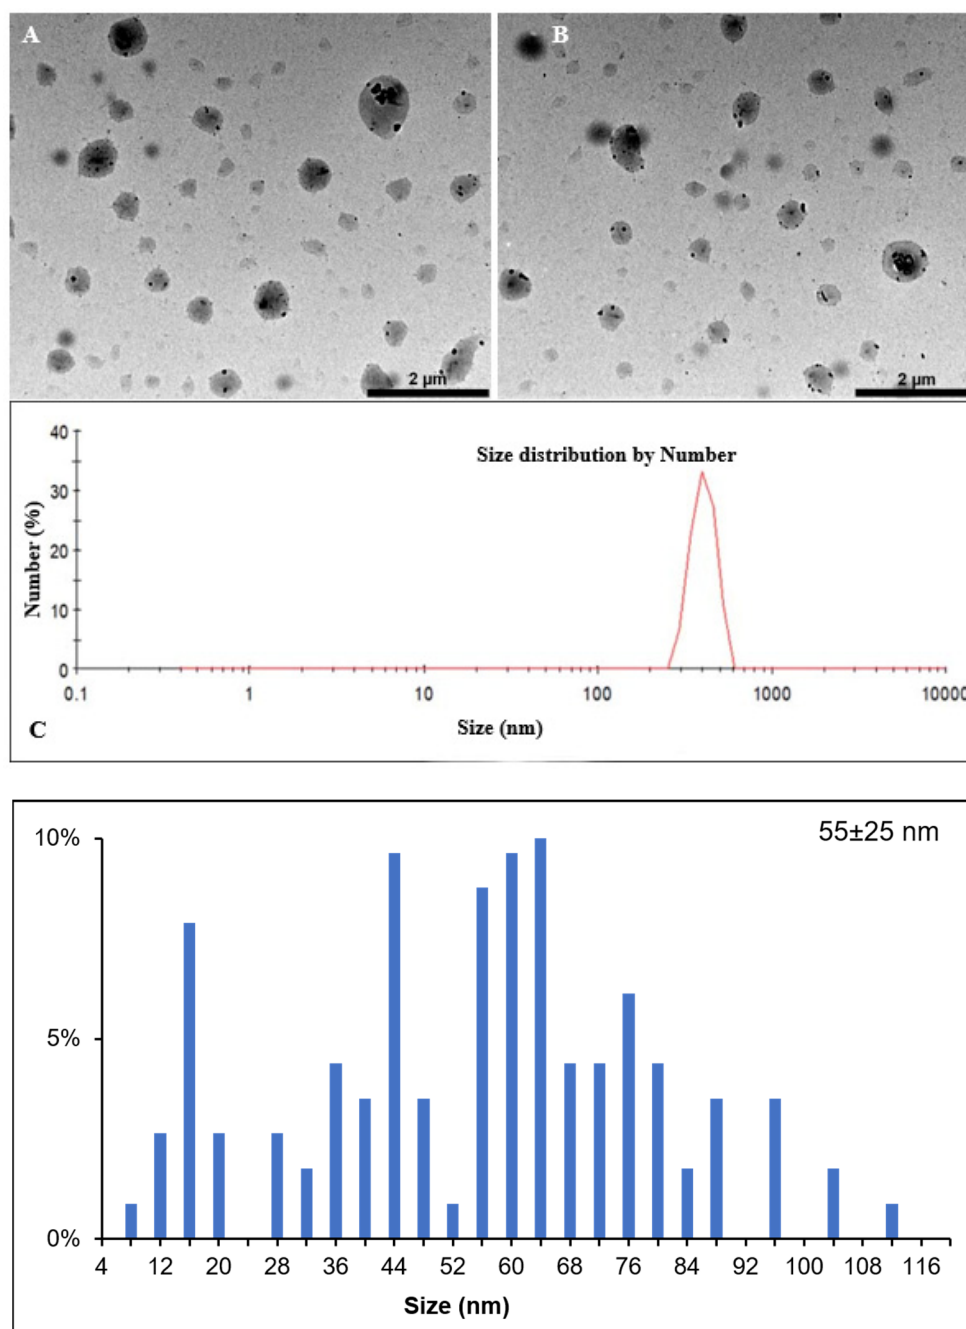

**D**

**Figure S3.** Characterization of acephate nanopesticides ( $55 \pm 25$  nm). (A-B) Typical TEM images. (C) represents size distribution by DLS characterization. (D) size distribution histogram using such images.

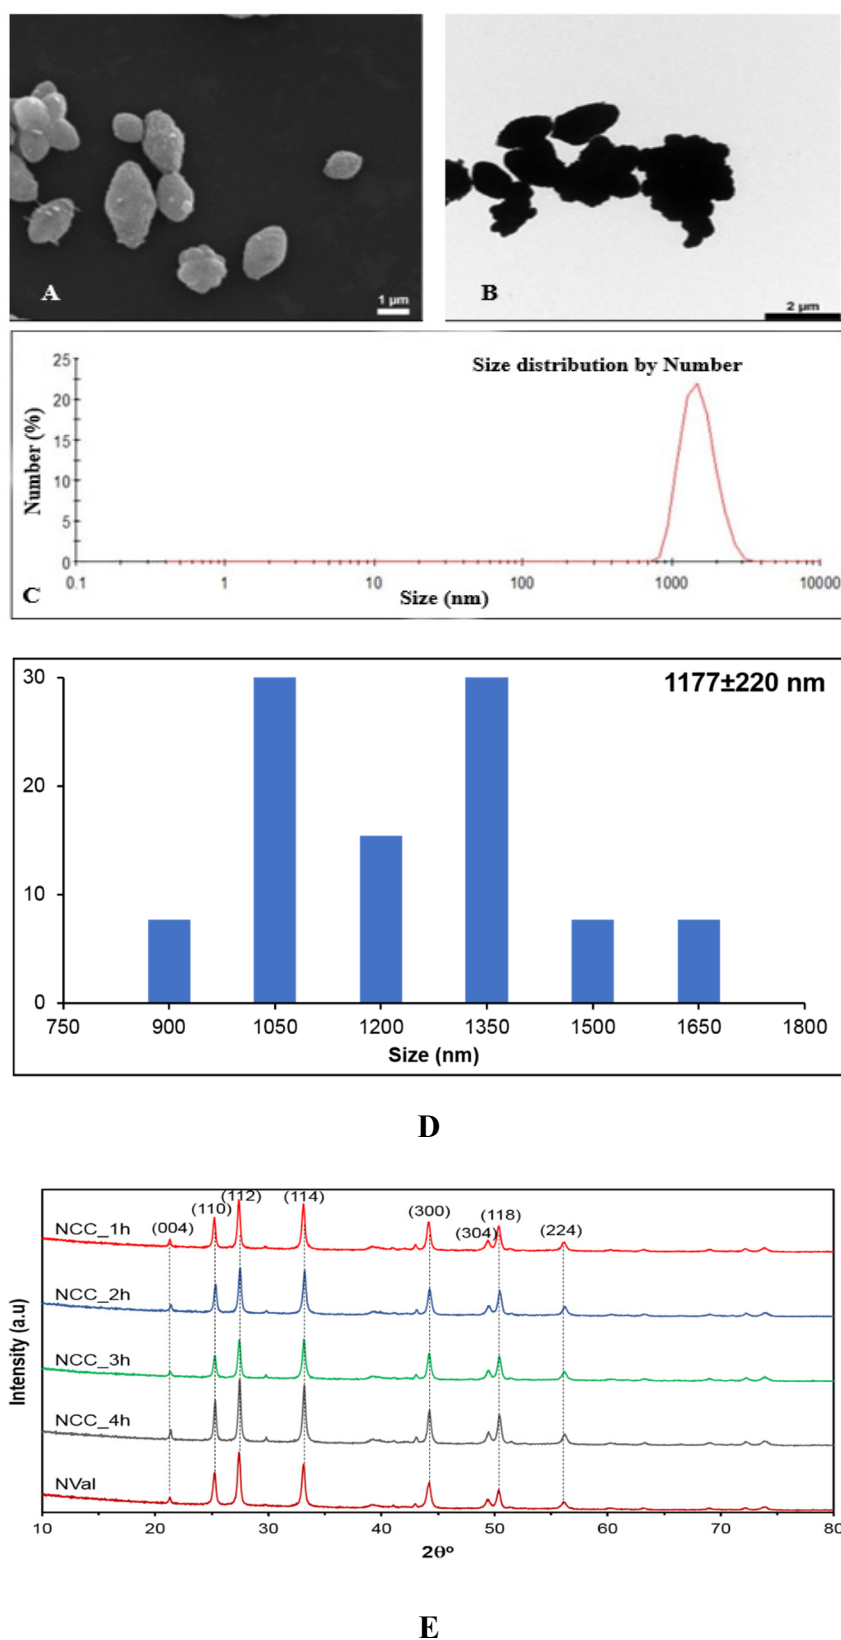

**Figure S4.** Characterization of validamycin nanopesticides ( $1177 \pm 220$  nm). (A) Typical SEM image. (B) typical TEM image. (C) represents size distribution by DLS characterization. (D) size distribution histogram using such images. (E) XRD diffraction pattern.

A.

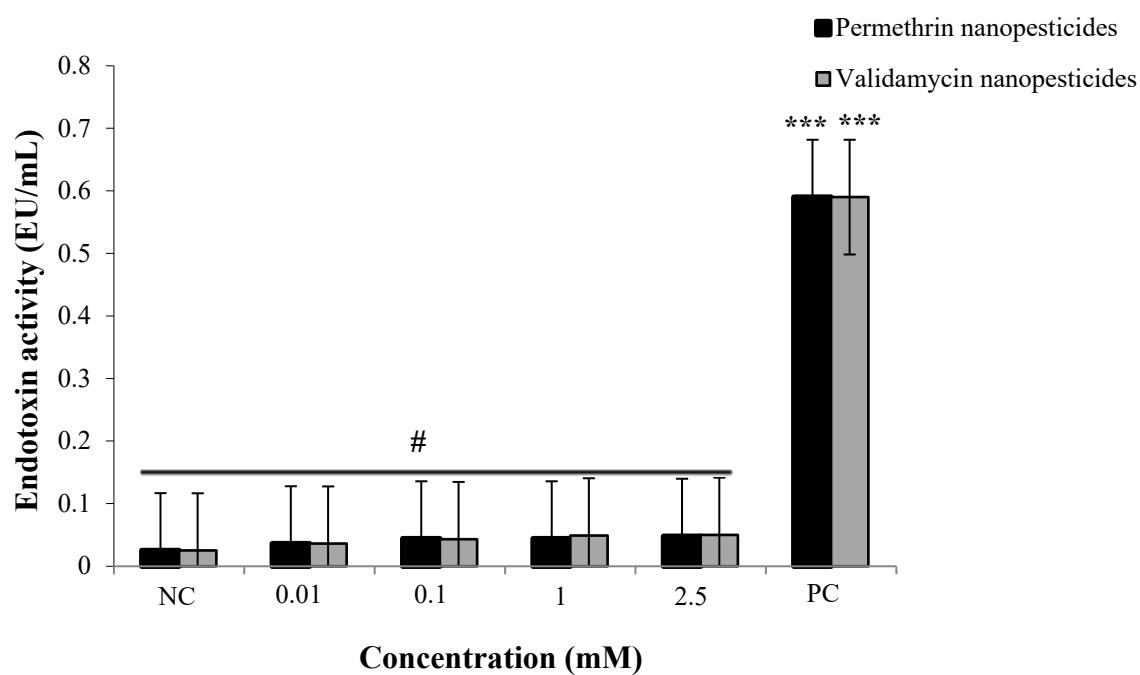

B.

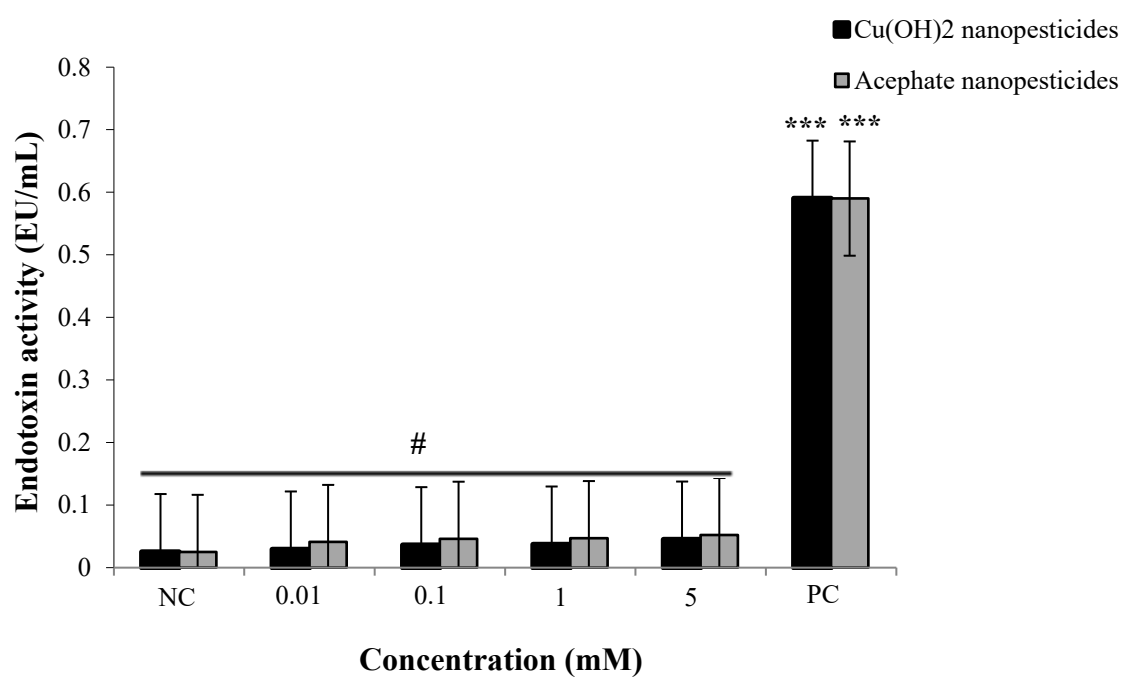

**Figure S5.** Endotoxin level (EU/mL) in different concentrations of permethrin nanopesticides and validamycin nanopesticides (A) and Cu(OH)<sub>2</sub> nanopesticides and acephate nanopesticides

(B) detected using chromogenic *Limulus* amoebocyte lysate (LAL) assay. Each point represents a mean of 3 replicates  $\pm$  standard error. Assays were performed according to the kit protocol (Lonza, QCL-1000™). Lipopolysaccharide (LPS) (0.5 EU/ml) was used as the positive control (PC). # The endotoxin level of the nanopesticides was below the limit of detection (0.116667 EU/ml). \*\*\* $P \leq 0.001$  when compared with the negative control (LAL reagent water) using the Student's *t*-test.

## Supplementary Tables

**Table S1.** Summary of the mortality rates and LC<sub>50</sub> values obtained in the *Drosophila* larvae after exposure to permethrin and permethrin nanopesticides.

| Test compounds            | Concentration (mM)    | Mortality rate (± SE) | LC <sub>50</sub> values (95% lower and upper confidence limits) | Slope (± SE)    |
|---------------------------|-----------------------|-----------------------|-----------------------------------------------------------------|-----------------|
|                           | Distilled water       | 0 ± 0.0               |                                                                 |                 |
|                           | Ethanol (2%)          | 6 ± 1.3 a             |                                                                 |                 |
|                           | Nano-capsule (2.5 mM) | 7 ± 1.1 a             |                                                                 |                 |
| Permethrin                | 0.01                  | 8 ± 1.5 a             | 0.1<br>(0.08-0.45)                                              | 9.108<br>(0.32) |
|                           | 0.03                  | 16 ± 3.1 a            |                                                                 |                 |
|                           | 0.06                  | 27 ± 3.6 b            |                                                                 |                 |
|                           | 0.1                   | 48 ± 7.2 c            |                                                                 |                 |
|                           | 0.5                   | 67 ± 3.1 d            |                                                                 |                 |
|                           | 1                     | 71 ± 3.9 d            |                                                                 |                 |
|                           | 2.5                   | 76 ± 2.6 d            |                                                                 |                 |
|                           | 5                     | 80 ± 5.2 e            |                                                                 |                 |
|                           | 7.5                   | 83 ± 4.7 e            |                                                                 |                 |
|                           | 10                    | 87 ± 3.1 e            |                                                                 |                 |
| Permethrin nanopesticides | 0.01                  | 9 ± 1.2 a             | 2.5<br>(1.38-4.13)                                              | 9.272<br>(0.37) |
|                           | 0.03                  | 12 ± 2.8 a            |                                                                 |                 |
|                           | 0.06                  | 18 ± 3.1 b            |                                                                 |                 |
|                           | 0.1                   | 22 ± 6.4 b            |                                                                 |                 |
|                           | 0.5                   | 26 ± 2.6 b            |                                                                 |                 |
|                           | 1                     | 32 ± 3.2 c            |                                                                 |                 |
|                           | 2.5                   | 49 ± 2.9 d            |                                                                 |                 |
|                           | 5                     | 78 ± 5.6 e            |                                                                 |                 |
|                           | 7.5                   | 84 ± 4.2 e            |                                                                 |                 |
|                           | 10                    | 90 ± 2.2 e            |                                                                 |                 |

SE: Standard Error

Means within a column followed by the same lower letter are not significantly different as per Duncan Multiple Range test ( $P \leq 0.05$ )

**Table S2.** Summary of the mortality rates and LC<sub>50</sub> values obtained in the *Drosophila* larvae after exposure to CuSO<sub>4</sub>·5H<sub>2</sub>O and Cu(OH)<sub>2</sub> nanopesticides.

| Test compounds | Concentration (mM) | Mortality rate (± SE) | LC <sub>50</sub> values (95% lower and upper confidence limits) | Slope (± SE) |
|----------------|--------------------|-----------------------|-----------------------------------------------------------------|--------------|
|                | Distilled water    | 0 ± 0.0               |                                                                 |              |
|                | 0.01               | 6 ± 1.7 a             |                                                                 |              |

|                                       |      |            |                  |                 |
|---------------------------------------|------|------------|------------------|-----------------|
| CuSO <sub>4</sub> .5H <sub>2</sub> O  | 0.1  | 18 ± 2.7 a | 5<br>(2.91-5.83) | 10.46<br>(0.67) |
|                                       | 0.5  | 21 ± 3.2 b |                  |                 |
|                                       | 1    | 27 ± 6.1 b |                  |                 |
|                                       | 2.5  | 31 ± 3.3 b |                  |                 |
|                                       | 5    | 48 ± 3.5 c |                  |                 |
|                                       | 7.5  | 72 ± 2.2 d |                  |                 |
|                                       | 10   | 90 ± 5.7 e |                  |                 |
| Cu(OH) <sub>2</sub><br>nanopesticides | 0.01 | 5 ± 1.5 a  | 5<br>(2.93-5.47) | 10.48<br>(0.59) |
|                                       | 0.1  | 10 ± 2.4 a |                  |                 |
|                                       | 0.5  | 16 ± 2.5 a |                  |                 |
|                                       | 1    | 22 ± 6.1 b |                  |                 |
|                                       | 2.5  | 28 ± 3.2 b |                  |                 |
|                                       | 5    | 49 ± 3.6 c |                  |                 |
|                                       | 7.5  | 70 ± 2.6 d |                  |                 |
|                                       | 10   | 86 ± 5.2 e |                  |                 |

SE: Standard Error

Means within a column followed by the same lower letter are not significantly different as per Duncan Multiple Range test ( $P \leq 0.05$ )

**Table S3.** Summary of the mortality rates and LC<sub>50</sub> values obtained in the *Drosophila* larvae after exposure to acephate and acephate nanopesticides.

| Test compounds          | Concentration (mM)            | Mortality rate (± SE) | LC <sub>50</sub> values (95% lower and upper confidence limits) | Slope (± SE)    |
|-------------------------|-------------------------------|-----------------------|-----------------------------------------------------------------|-----------------|
|                         | Distilled water               | 0 ± 0.0               |                                                                 |                 |
|                         | Nano-capsule (PEG-400) (5 mM) | 6 ± 1.7 a             |                                                                 |                 |
| Acephate                | 0.01                          | 7 ± 2.1 a             | 5<br>(2.78-6.43)                                                | 10.8<br>(0.83)  |
|                         | 0.1                           | 10 ± 2.9 a            |                                                                 |                 |
|                         | 0.5                           | 22 ± 3.5 b            |                                                                 |                 |
|                         | 1                             | 30 ± 5.3 b            |                                                                 |                 |
|                         | 2.5                           | 35 ± 2.9 b            |                                                                 |                 |
|                         | 5                             | 49 ± 3.2 c            |                                                                 |                 |
|                         | 7.5                           | 78 ± 2.7 d            |                                                                 |                 |
|                         | 10                            | 86 ± 4.4 e            |                                                                 |                 |
| Acephate nanopesticides | 0.01                          | 4 ± 1.1 a             | 5<br>(2.86-6.32)                                                | 10.36<br>(0.91) |
|                         | 0.1                           | 8 ± 2.2 a             |                                                                 |                 |
|                         | 0.5                           | 18 ± 3.1 a            |                                                                 |                 |
|                         | 1                             | 27 ± 6.6 b            |                                                                 |                 |
|                         | 2.5                           | 32 ± 2.8 b            |                                                                 |                 |
|                         | 5                             | 48 ± 3.9 c            |                                                                 |                 |
|                         | 7.5                           | 72 ± 2.1 d            |                                                                 |                 |
|                         | 10                            | 81 ± 4.8 e            |                                                                 |                 |



SE: Standard Error

Means within a column followed by the same lower letter are not significantly different as per Duncan Multiple Range test ( $P \leq 0.05$ )

**Table S4.** Summary of the mortality rates and LC<sub>50</sub> values obtained in the *Drosophila* larvae after exposure to validamycin and validamycin nanopesticides.

| Test compounds             | Concentration (mM)    | Mortality rate ( $\pm$ SE) | LC <sub>50</sub> values (95% lower and upper confidence limits) | Slope ( $\pm$ SE) |
|----------------------------|-----------------------|----------------------------|-----------------------------------------------------------------|-------------------|
|                            | Distilled water       | 0 $\pm$ 0.0                |                                                                 |                   |
|                            | Nano-capsule (2.5 mM) | 6 $\pm$ 2.8 a              |                                                                 |                   |
| CaCO <sub>3</sub>          | 0.01                  | 4 $\pm$ 3.3 a              | 5<br>(2.77-5.92)                                                | 10.86<br>(0.77)   |
|                            | 0.1                   | 16 $\pm$ 2.2 b             |                                                                 |                   |
|                            | 0.5                   | 27 $\pm$ 4.1 c             |                                                                 |                   |
|                            | 1                     | 35 $\pm$ 5.9 c             |                                                                 |                   |
|                            | 2.5                   | 39 $\pm$ 2.2 d             |                                                                 |                   |
|                            | 5                     | 48 $\pm$ 3.5 e             |                                                                 |                   |
|                            | 7.5                   | 80 $\pm$ 2.1 f             |                                                                 |                   |
|                            | 10                    | 87 $\pm$ 3.7 f             |                                                                 |                   |
| Validamycin                | 0.01                  | 8 $\pm$ 2.1 a              | 2.5<br>(1.82-5.08)                                              | 11.33<br>(0.65)   |
|                            | 0.1                   | 15 $\pm$ 1.8 a             |                                                                 |                   |
|                            | 0.5                   | 24 $\pm$ 1.9 b             |                                                                 |                   |
|                            | 1                     | 32 $\pm$ 3.7 b             |                                                                 |                   |
|                            | 2.5                   | 49 $\pm$ 2.6 c             |                                                                 |                   |
|                            | 5                     | 67 $\pm$ 3.1 d             |                                                                 |                   |
|                            | 7.5                   | 77 $\pm$ 3.3 d             |                                                                 |                   |
|                            | 10                    | 86 $\pm$ 3.8 e             |                                                                 |                   |
| Validamycin nanopesticides | 0.01                  | 3 $\pm$ 1.6 a              | 2.5<br>(1.95-4.47)                                              | 11.26<br>(0.53)   |
|                            | 0.1                   | 11 $\pm$ 2.5 a             |                                                                 |                   |
|                            | 0.5                   | 19 $\pm$ 2.4 b             |                                                                 |                   |
|                            | 1                     | 30 $\pm$ 4.2 b             |                                                                 |                   |
|                            | 2.5                   | 47 $\pm$ 2.1 c             |                                                                 |                   |
|                            | 5                     | 64 $\pm$ 3.3 d             |                                                                 |                   |
|                            | 7.5                   | 73 $\pm$ 3.7 d             |                                                                 |                   |
|                            | 10                    | 83 $\pm$ 4.2 e             |                                                                 |                   |

SE: Standard Error

Means within a column followed by the same lower letter are not significantly different as per Duncan Multiple Range test ( $P \leq 0.05$ )
